# Supplementary material for: Topography of Cholinergic Changes in Dementia With Lewy Bodies and Key Neural Network Hubs
Source: Atypon-hosted journal article supplement (doi:10.1176/appi.neuropsych.19070165), 2020-06-05
Supplement: appi.neuropsych.19070165.ds001.pdf [file appi.neuropsych.19070165.ds001.pdf]

Supplemental figures:

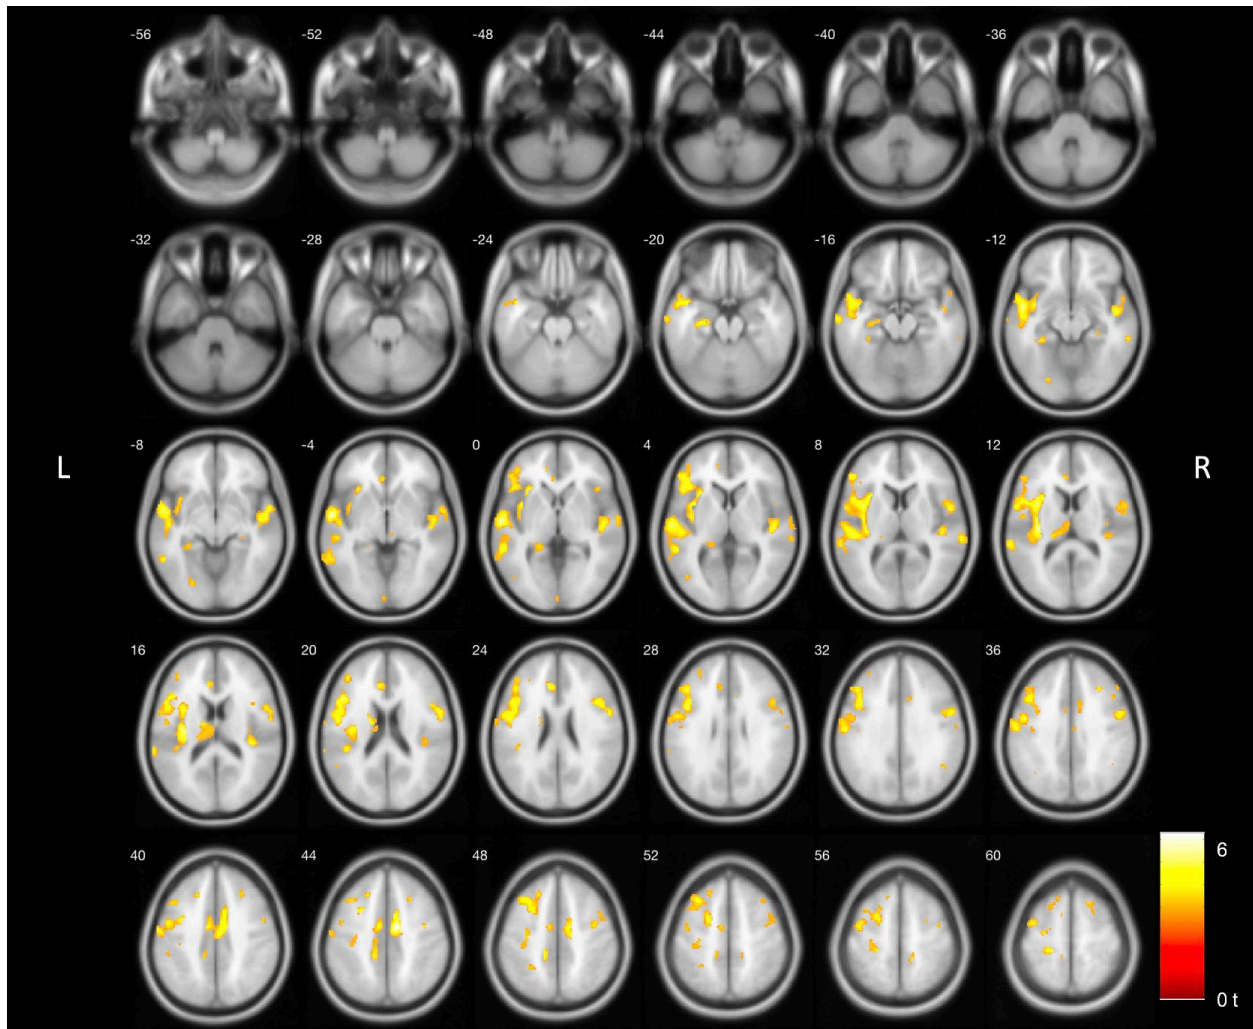

Supplemental Figure 1. Clusters of reduced cholinergic binding in Dementia with Lewy bodies with education in years included as a covariate.

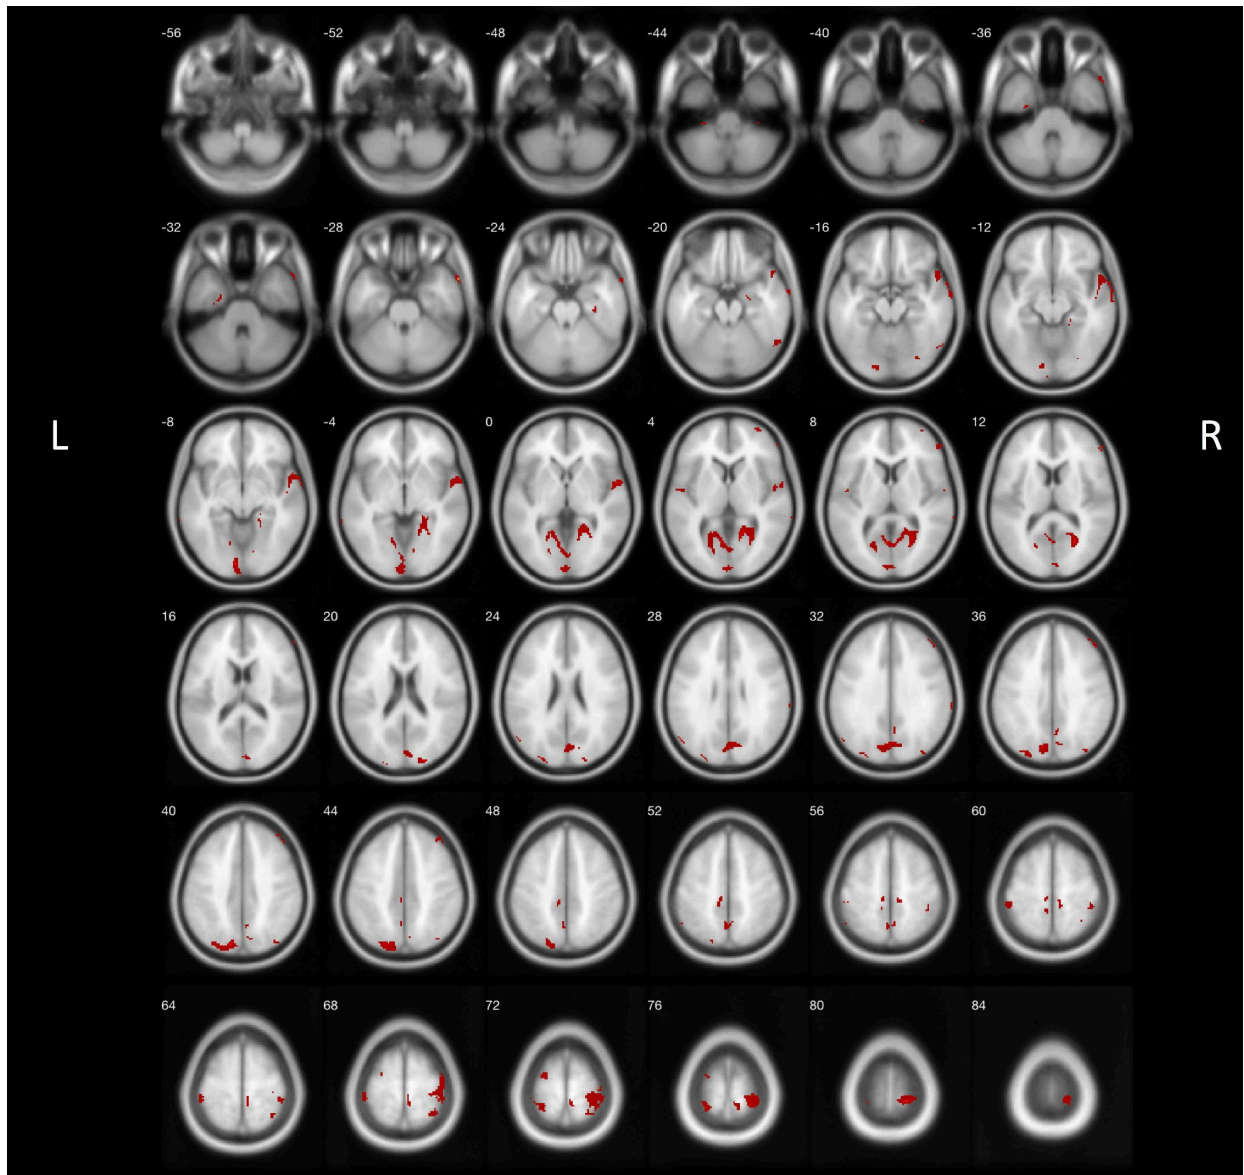

Supplemental Figure 2. Exploratory voxel-based regression analysis of FEOBV PET with MMSE as outcome parameter show clusters in the following regions: bilateral lateral geniculate nucleus, bilateral lingual gyri/optic radiation, left medial occipital, left superior posterior parietal, right superior parietal, right posterior frontal, and right superior temporal cortices and the right hippocampus (uncorrected  $P < 0.05$ ). No clusters meeting this criterion were found for a similar PET-MMSE regression analysis in the normal control group.
